# Supplementary material for: Reassessing the Role of Type II Toxin-Antitoxin Systems in Formation of Escherichia coli Type II Persister Cells
Source: PubMed Central journal article supplement (PMC6016239; doi:10.1128/mbio.00640-18), 2018-06-12

**A** $\lambda$  (*attB*) $\phi$ 80-1 $\phi$ 80-2 $\phi$ 80-3MG1655  $\Delta$ 10KG MG1655  $\Delta$ 10KG MG1655  $\Delta$ 10KG MG1655  $\Delta$ 10KG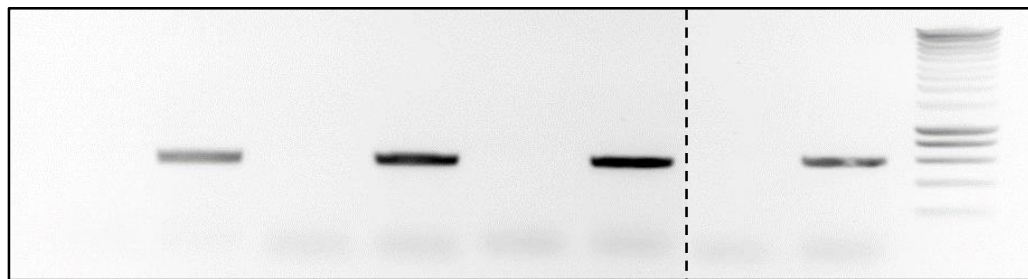**B**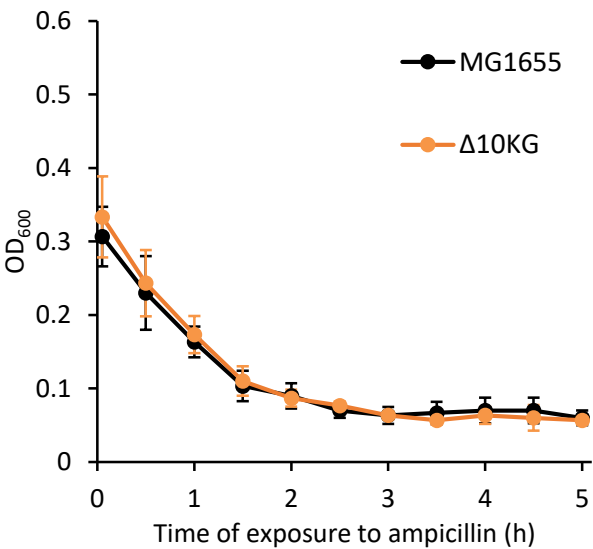**C**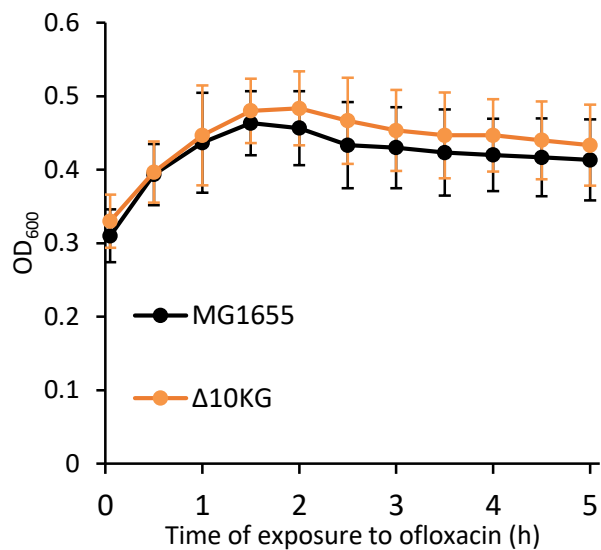

Supplement: mbo003183929sf2.pdf [file mbo003183929sf2.pdf]
