# Supplementary material for: Reassessing the Role of Type II Toxin-Antitoxin Systems in Formation of Escherichia coli Type II Persister Cells
Source: PubMed Central journal article supplement (PMC6016239; doi:10.1128/mbio.00640-18), 2018-06-12

TL

Ex 488  
Em 493-575

Ex 561  
Em 578-696

Merge

MG1655

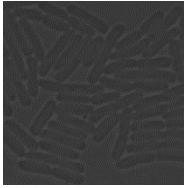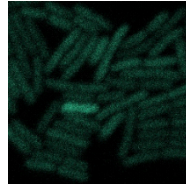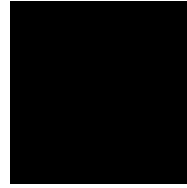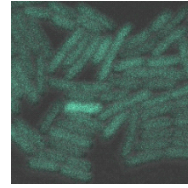

MG1655  
*rpoS-mcherry*

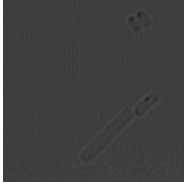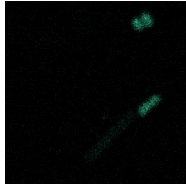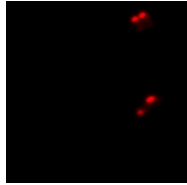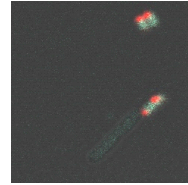

Supplement: mbo003183929sf3.pdf [file mbo003183929sf3.pdf]
