# Supplementary material for: Reassessing the Role of Type II Toxin-Antitoxin Systems in Formation of Escherichia coli Type II Persister Cells
Source: PubMed Central journal article supplement (PMC6016239; doi:10.1128/mbio.00640-18), 2018-06-12

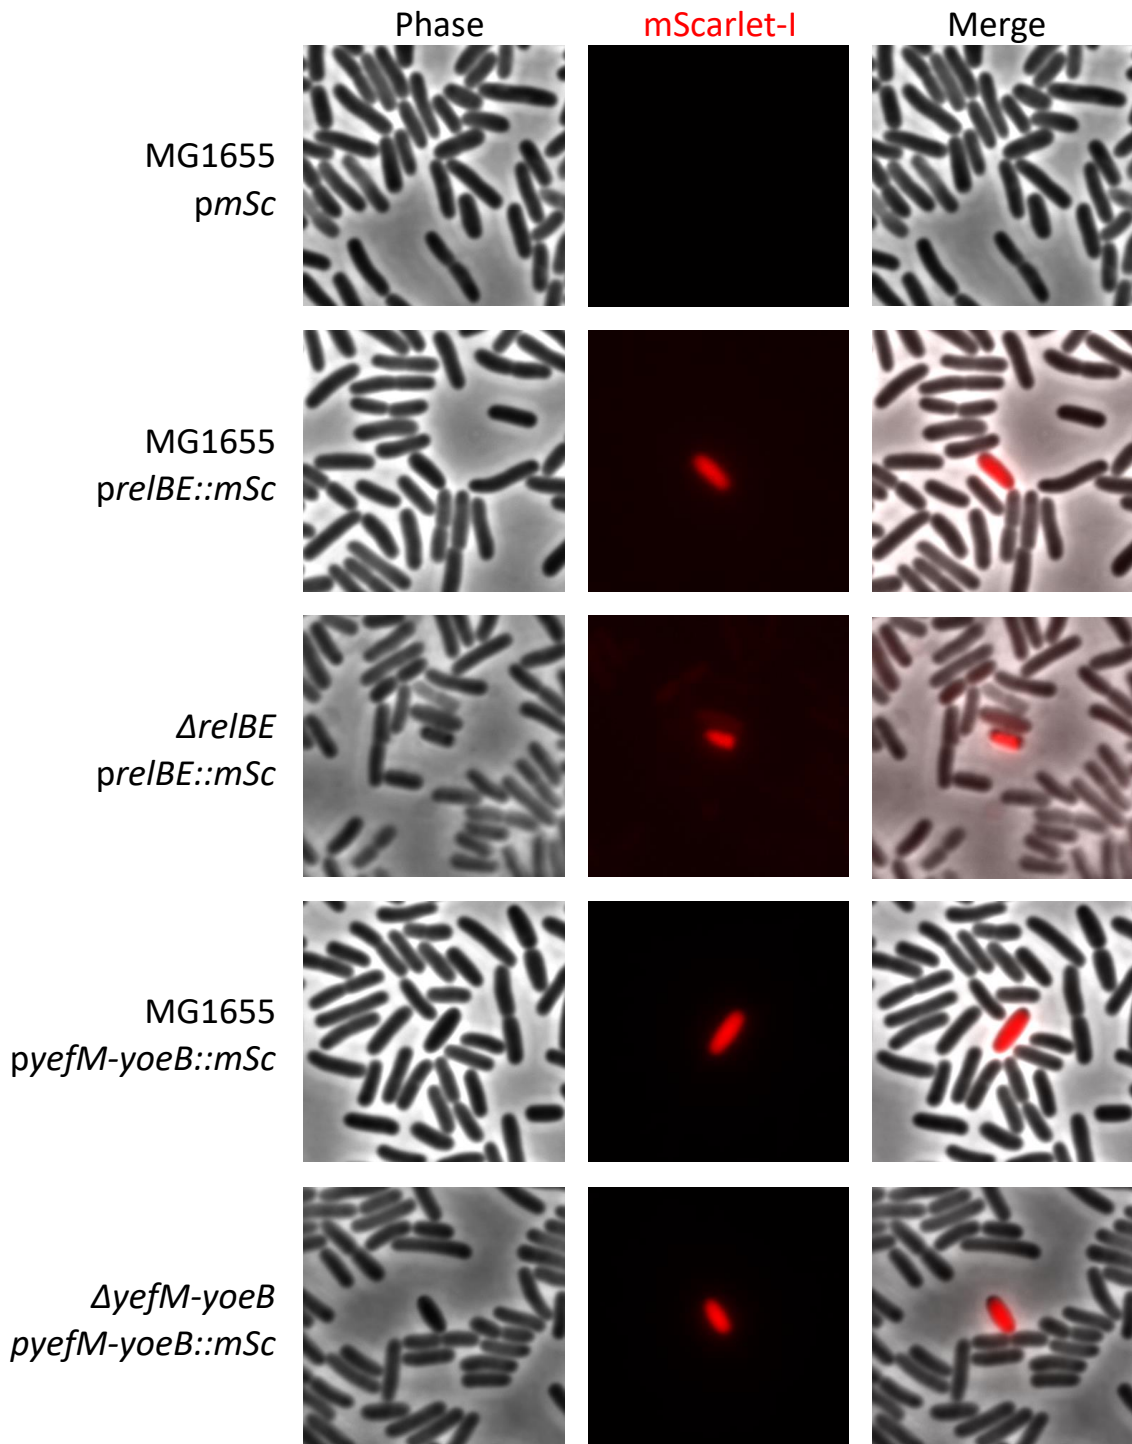

Supplement: mbo003183929sf4.pdf [file mbo003183929sf4.pdf]
