# Supplementary material for: Reassessing the Role of Type II Toxin-Antitoxin Systems in Formation of Escherichia coli Type II Persister Cells
Source: PubMed Central journal article supplement (PMC6016239; doi:10.1128/mbio.00640-18), 2018-06-12
Supplement: mbo003183929st1.pdf [file mbo003183929st1.pdf]

**Table S1: Genetic rearrangements and polymorphisms identified in TA deletion mutants**

| Coordinate    | MG1655 | $\Delta 10LVM$ | $\Delta 5KG$ | $\Delta 7KG$ | $\Delta 8KG$ | $\Delta K9G$ | $\Delta 10KG$ | Description                       |
|---------------|--------|----------------|--------------|--------------|--------------|--------------|---------------|-----------------------------------|
| 1340001       |        |                |              |              |              |              |               | Silent SNP in <i>pgpB</i> G→T     |
| 4474834       |        |                |              |              |              |              |               | Mutation 27 bp before <i>tabA</i> |
| 4549192       |        |                |              |              |              |              |               | SNP in <i>fimH</i><br>T→G Thr→Asp |
| 807327        |        |                |              |              |              |              |               | $\lambda$ prophage insertion      |
| 1310570       |        |                |              |              |              |              |               | $\phi 80$ -1 prophage insertion   |
| 3192087       |        |                |              |              |              |              |               | $\phi 80$ -2 prophage insertion   |
| 2052027       |        |                |              |              |              |              |               | $\phi 80$ -3 prophage insertion   |
| 3801371       |        |                |              |              |              |              |               | Insertion in <i>waaJ</i> (T)      |
| 677815-687900 |        |                |              |              |              |              |               | 10 kbp deletion                   |
| 3038242       |        |                |              |              |              |              |               | SNP in <i>dsbC</i><br>G→C Gly→Ala |
