# Supplementary material for: Reassessing the Role of Type II Toxin-Antitoxin Systems in Formation of Escherichia coli Type II Persister Cells
Source: PubMed Central journal article supplement (PMC6016239; doi:10.1128/mbio.00640-18), 2018-06-12
Supplement: mbo003183929st2.pdf [file mbo003183929st2.pdf]

**Table S2: LFQ-MS analysis of  $\Delta 10$  strains**

|             | <b>MG1655</b> | <b><math>\Delta 10</math>KG</b> | <b><math>\Delta 10</math>LVM</b> |
|-------------|---------------|---------------------------------|----------------------------------|
| <b>MazE</b> | <b>24.9</b>   | <b>30.9</b>                     | <b>ND</b>                        |
| <b>MazG</b> | <b>26.7</b>   | <b>30</b>                       | <b>ND</b>                        |
| <b>GltI</b> | <b>32</b>     | <b>ND</b>                       | <b>30.9</b>                      |
| <b>GltL</b> | <b>27.6</b>   | <b>ND</b>                       | <b>28.4</b>                      |
| <b>RihA</b> | <b>30.7</b>   | <b>ND</b>                       | <b>30.8</b>                      |
| YlaC        | <b>29.4</b>   | <b>26.8</b>                     | <b>29.5</b>                      |
| CobS        | <b>28.8</b>   | <b>28.3</b>                     | <b>24.4</b>                      |
| <b>TabA</b> | <b>28.6</b>   | <b>28.8</b>                     | <b>23.1</b>                      |
