# Supplementary material for: Reassessing the Role of Type II Toxin-Antitoxin Systems in Formation of Escherichia coli Type II Persister Cells
Source: PubMed Central journal article supplement (PMC6016239; doi:10.1128/mbio.00640-18), 2018-06-12
Supplement: mbo003183929st3.pdf [file mbo003183929st3.pdf]

**Table S3: Strains and plasmids used in this study**

| <b>Strain</b>            | <b>Genotype</b>                                                                                                              | <b>Reference</b> |
|--------------------------|------------------------------------------------------------------------------------------------------------------------------|------------------|
| MG1655                   | <i>E. coli</i> K-12 F, $\lambda$ , <i>ilvG</i> , <i>rfb-50</i> , <i>rph-1</i>                                                | (1)              |
| SC301467 ( $\Delta$ 5KG) | MG1655 $\Delta$ <i>mazF</i> $\Delta$ <i>chpSB</i> $\Delta$ <i>relBEF</i> $\Delta$ <i>dinJ-yafQ</i> $\Delta$ <i>yefM-yoeB</i> | (2)              |
| MGJ598 ( $\Delta$ 7KG)   | $\Delta$ 5KG $\Delta$ <i>higBA</i> $\Delta$ <i>prfF-yhaV</i>                                                                 | (2)              |
| MGJ5987 ( $\Delta$ 8KG)  | $\Delta$ 7KG $\Delta$ <i>yafNO</i>                                                                                           | (2)              |
| MGJ5987 ( $\Delta$ 9KG)  | $\Delta$ 8KG $\Delta$ <i>mqsRA</i>                                                                                           | (2)              |
| MGJ5987 ( $\Delta$ 10KG) | $\Delta$ 9KG $\Delta$ <i>hicAB</i>                                                                                           | (2)              |
| LVM100 ( $\Delta$ 5LVM)  | MG1655 $\Delta$ <i>chpSB</i> $\Delta$ <i>mazEF</i> $\Delta$ <i>relBE</i> $\Delta$ <i>yefM-yoeB</i> $\Delta$ <i>dinJ-yafQ</i> | (3)              |
| $\Delta$ 10LVM           | LVM100 $\Delta$ <i>yafNO</i> $\Delta$ <i>prfF-yhaV</i> $\Delta$ <i>hicAB</i> $\Delta$ <i>higBA</i> $\Delta$ <i>mqsRA</i>     | (4)              |
| <i>rpoS-mcherry</i>      | MG1655 <i>rpoS-mCherry::frt</i>                                                                                              | (5)              |
| <i>yoeB::gfp</i>         | MG1655 <i>yoeB::GFP::frt</i>                                                                                                 | (5)              |
| <i>relE::gfp</i>         | MG1655 <i>relE::GFP::frt</i>                                                                                                 | (5)              |
| <b>Plasmid</b>           | <b>Properties</b>                                                                                                            | <b>Reference</b> |
| pET <i>gfpmut2</i>       | pET41a <i>ptac::gfpmut2-AGGAGG(3)-CAT-trpterminator</i>                                                                      | (6)              |
| pBeloBAC11               | <i>cat ori2(F) repE parABC cos lacZ<math>\alpha</math></i>                                                                   | NEB              |
| <i>pmSc</i>              | pBeloBAC11 $\Delta$ ( <i>lacZ<math>\alpha</math>-cos</i> )::( $\lambda$ <i>t1ter-mScarlet-I-T7TE-luxIA</i> )                 | This study       |
| <i>pyefMyoeB::mSc</i>    | pBeloBAC11 $\Delta$ ( <i>lacZ<math>\alpha</math>-cos</i> )::( $\lambda$ <i>t1ter-pyefMyoeB::mScarlet-I-T7TE-luxIA</i> )      | This study       |
| <i>prelBE::mSc</i>       | pBeloBAC11 $\Delta$ ( <i>lacZ<math>\alpha</math>-cos</i> )::( $\lambda$ <i>t1-prelBE::mScarlet-I-T7TE-luxIA</i> )            | This study       |

**References cited in Table S3**

1. Blattner FR, Plunkett G, 3rd, Bloch CA, Perna NT, Burland V, Riley M, Collado-Vides J, Glasner JD, Rode CK, Mayhew GF, Gregor J, Davis NW, Kirkpatrick HA, Goeden MA, Rose DJ, Mau B, Shao Y. 1997. The complete genome sequence of *Escherichia coli* K-12. *Science* 277:1453-1462.
2. Maisonneuve E, Shakespeare LJ, Jorgensen MG, Gerdes K. 2011. Bacterial persistence by RNA endonucleases. *Proc Natl Acad Sci U S A* 108:13206-13211.
3. Tsilibaris V, Maenhaut-Michel G, Mine N, Van Melderen L. 2007. What is the benefit to *Escherichia coli* of having multiple toxin-antitoxin systems in its genome? *J Bacteriol* 189:6101-6108.
4. Goeders N, Dreze PL, Van Melderen L. 2013. Relaxed cleavage specificity within the RelE toxin family. *J Bacteriol* 195:2541-2549.
5. Maisonneuve E, Castro-Camargo M, Gerdes K. 2013. (p)ppGpp controls bacterial persistence by stochastic induction of toxin-antitoxin activity. *Cell* 154:1140-1150.
6. Luidalepp H, Joers A, Kaldalu N, Tenson T. 2011. Age of inoculum strongly influences persister frequency and can mask effects of mutations implicated in altered persistence. *J Bacteriol* 193:3598-3605.
