# Supplementary material for: Reassessing the Role of Type II Toxin-Antitoxin Systems in Formation of Escherichia coli Type II Persister Cells
Source: PubMed Central journal article supplement (PMC6016239; doi:10.1128/mbio.00640-18), 2018-06-12
Supplement: mbo003183929st4.pdf [file mbo003183929st4.pdf]

**Table S4 : Primers used in this study**

|                  |                                              |
|------------------|----------------------------------------------|
| AvrII-relB F     | CCCGCCTAGGCCAGTAAGATGATGGCCGG                |
| NsiI-relB R      | CCCCATGCATGTCTTACACCTCTTGTAATTACAAATGTCA     |
| AvrII-yefM F     | CCCGCCTAGGATTTTATGGCAATGGATTTGTTTAATGAATGAGC |
| NsiI-yefM R      | CCGCATGCATGTCAATCTCCTCTTTTGTACAGT            |
| ybhC (lambda) F  | CGGTTTGATCAGAAGGACGTT                        |
| lambda R         | GCTCTCGGAATATCAATGAAGG                       |
| kch (phi80-1) F  | ACTGTACCTCAGGAAAGGTCA                        |
| glgS (phi80-2) F | CATCAAACGTCAATGGGGTGC                        |
| yeeJ (phi80-3) F | CATTACACGACTGACGCTGGTT                       |
| phi80 R          | CTGAAAACAGCAAGTGGTCCG                        |
